# Supplementary material
Source: Springer Nature journal article supplement (https://www.springermedizin.de/resource/supplementary/12889_2012_4219_MOESM1_ESM.pdf/9492064)

**Identification**

Records identified through  
database searching  
(n = 5966)

Additional records identified  
through other sources  
(n = 204)

**Screening**

Records after duplicates removed  
(n = 2940)

Records screened  
(n = 2940)

Records excluded  
(n = 1395)

**Inclusion**

Abstracts analysed  
(n = 1545)

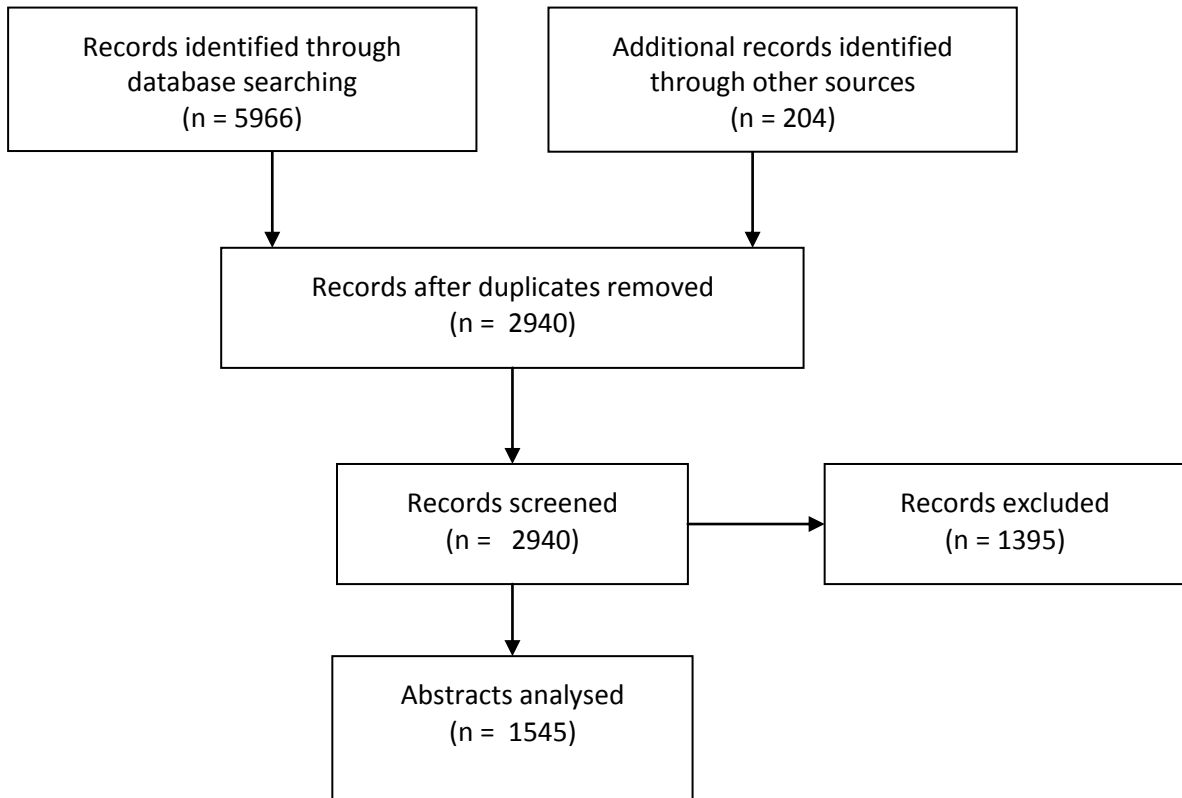

Supplement: MOESM1 [file 9492064]
